# Increased Plasma Endothelin in NIDDM Patients With Retinopathy

MAKIKO KAWAMURA, MD  
 HISAKO OHGAWARA, MD  
 MITSUhide NARUSE, MD  
 NOBUHIRO SUZUKI, PHD  
 NAOKO IWASAKI, MD

KIYOKO NARUSE, MD  
 SADA O HORI, MD  
 HIROSHI DEMURA, MD  
 YASUE OMORI, MD

**OBJECTIVE**— To elucidate the significance of ET in diabetic microvascular disease.

**RESEARCH DESIGN AND METHODS**— We determined plasma levels of ir-ET-1 in 25 NIDDM patients without hypertension and/or renal dysfunction.

**RESULTS**— The plasma levels of ir-ET-1 in NIDDM patients with simple ( $n = 8$ ) and proliferative ( $n = 8$ ) retinopathy were  $0.58 \pm 0.04$  pM and  $0.60 \pm 0.04$  pM, respectively, which were significantly higher than those in normal, nondiabetic subjects ( $0.24 \pm 0.02$  pM [ $n = 31$ ]) and NIDDM patients without retinopathy ( $0.30 \pm 0.05$  pM [ $n = 9$ ]).

**CONCLUSIONS**— These results suggest that plasma ET-1 is related to diabetic microvascular disease.

Endothelin (ET) was discovered in porcine aortic endothelial cells and produces a potent, long-lasting vasoconstriction (1). The presence of ir-ET in the circulating blood (2) suggests that ET is involved in the pathophysiology of various cardiovascular diseases. Although Takahashi et al. (3) recently reported elevated plasma

levels of ir-ET in patients with diabetes mellitus, the details of the pathophysiological significance of the elevated ET remain to be elucidated. Because retinopathy is often an early manifestation of diabetic microvascular disease, we determined plasma levels of ir-ET-1 in patients with diabetes mellitus and retinopathy.

FROM THE DIABETES CENTER, DEPARTMENT OF MEDICINE, AND DIABETIC OPHTHALMOLOGY, INSTITUTE OF CLINICAL ENDOCRINOLOGY, DEPARTMENT OF MEDICINE, TOKYO WOMEN'S MEDICAL COLLEGE, TOKYO; AND THE TSUKUBA RESEARCH LABORATORIES, TAKEDA CHEMICAL INDUSTRIES, LTD., TSUKUBA, IBARAKI, JAPAN.

ADDRESS CORRESPONDENCE AND REPRINT REQUESTS TO DR. MAKIKO KAWAMURA, DEPARTMENT OF MEDICINE, DIABETES CENTER, TOKYO WOMEN'S MEDICAL COLLEGE, 8-1 KAWADACHO, SHINJUKU-KU, TOKYO 162, JAPAN.

RECEIVED FOR PUBLICATION 3 JUNE 1991 AND ACCEPTED IN REVISED FORM 18 FEBRUARY 1992.

NIDDM, NON-INSULIN-DEPENDENT DIABETES MELLITUS; ET, ENDOTHELIN; IR-ET-1, IMMUNOREACTIVE ENDOTHELIN-1; ET-1, ENDOTHELIN-1.

## RESEARCH DESIGN AND METHODS

Plasma levels of ir-ET-1 were determined in 25 NIDDM patients (aged 38–69 yr; mean  $\pm$  SE,  $53 \pm 2$  yr; 13 men, 12 women) and in 31 normal, nondiabetic subjects ( $51 \pm 2$  yr; 9 men, 22 women). All diabetic patients were chosen randomly from the clinic population except for their age, which we tried to match with that of normal, nondiabetic subjects. None of the patients had hypertension, evident renal dysfunction—verified by the absence of macroalbuminuria and a normal serum creatinine concentration—or signs of macrovascular disease. The degree of diabetic retinopathy was assessed by ophthalmoscopic examination by diabetic ophthalmologists. Blood samples were collected in chilled tubes containing  $\text{Na}_2\text{-EDTA}$  (4 mM) and  $5 \times 10^5$  IU/L aprotinin, and the separated plasma was stored at  $-70^\circ\text{C}$  until assayed. Plasma ir-ET-1 was determined by enzyme immunoassay (2) after extraction with an Amprep  $\text{C}_2$  cartridge (Amersham, UK) (4). The results are means  $\pm$  SE. Statistical analysis was conducted by Student's *t* test. The differences were considered significant at  $P < 0.05$ .

**RESULTS**— The plasma levels of ir-ET-1 in NIDDM patients were  $0.49 \pm 0.04$  pM ( $n = 25$ ), which represented significant difference from the values in approximately age-matched normal subjects ( $0.24 \pm 0.02$  pM [ $n = 31$ ]). The NIDDM patients were divided into two groups: those without retinopathy ( $n = 9$ ) and those with retinopathy ( $n = 16$ ; simple,  $n = 8$ ; proliferative,  $n = 8$ ). No significant difference was noted between the two groups in age ( $51 \pm 3$  vs.  $54 \pm 2$  yr), duration of NIDDM ( $9.6 \pm 1.5$  vs.  $11.1 \pm 1.9$  yr), blood pressure ( $127 \pm 4/81 \pm 2$  vs.  $126 \pm 3/76 \pm 2$  mmHg), serum creatinine concentration ( $67.2 \pm 3.5$  vs.  $75.1 \pm 5.3$  M), or average  $\text{HbA}_{1c}$  concentration over the preceding year ( $8.2 \pm 0.4$  vs.  $8.1 \pm 0.4\%$ ). Plasma levels of ir-ET-1 in patients with retinopa-

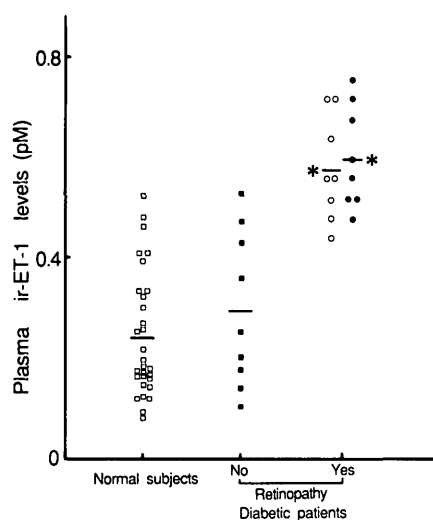

**Figure 1**—Plasma levels of ir-ET-1 in diabetic patients. Plasma levels were significantly higher in NIDDM group with simple (○) and proliferative (●) retinopathy than in normal, nondiabetic subjects (□) and in diabetic group without retinopathy (■). Bars represent means. \* $P < 0.001$  vs. values in normal, nondiabetic subjects and NIDDM patients without retinopathy.

thy ( $0.59 \pm 0.02$  pM [ $n = 16$ ]) were significantly higher ( $P < 0.001$ ) than those in normal subjects and in NIDDM patients without retinopathy ( $0.30 \pm 0.05$  pM [ $n = 9$ ]). In addition, we observed no significant difference in plasma ir-ET-1 levels between patients with simple retinopathy ( $0.58 \pm 0.04$  pM) and proliferative retinopathy ( $0.60 \pm 0.04$  pM).

**CONCLUSION**— In this study, we clearly demonstrated that plasma ir-ET-1 levels are significantly higher in NIDDM patients with diabetic retinopathy than in those without. The details of the mechanism responsible for the increased plasma levels are not known. However, because platelet aggregation often is accelerated in diabetes mellitus, production of ET-1 may be stimulated by the platelet-derived factor(s) (5). In addition, it has been reported recently that plasma levels of ET-1 are increased in patients with atherosclerosis (6). Therefore, the increased plasma ir-ET-1 levels also may be related to the microvascular disease associated with diabetes mellitus. That microaneurysm is accompanied by proliferation of endothelial cells (7) could be morphological evidence to support the stimulated endothelial function.

It is of interest that plasma ir-ET-1 levels are increased even in NIDDM patients with simple retinopathy. This result indicates that an increase in plasma ET-1 is an early phenomenon rather than a result of advanced stage of diabetes mellitus. However, whether the plasma ET-1 participates in the development of diabetic retinopathy is presently unclear.

**Acknowledgments**— This work was supported in part by research grants from the Japanese Ministry of Education, Science, and Culture and the Japanese Ministry of Health and Welfare "Disorders of Adrenal Hormones" Research Committee.

## References

1. Yanagisawa M, Kurihara H, Kimura S, Tomobe Y, Kobayashi M, Mitsui Y, Yazaki Y, Goto K, Masaki T: A novel potent vasoconstrictor peptide produced by vascular endothelial cells. *Nature (Lond)* 332:411–15, 1988
2. Suzuki N, Matsumoto H, Kitada C, Masaki T, Fujimoto M: A sensitive sandwich-enzyme immunoassay for human endothelin. *J Immunol Methods* 118:245–50, 1989
3. Takahashi K, Ghatei MA, Lam HC, O'Halloran DJ, Bloom SR: Elevated plasma endothelin in patients with diabetes mellitus. *Diabetologia* 33:306–10, 1990
4. Naruse M: Plasma immunoreactive endothelin but not thrombomodulin is increased in patient with hypertension and ischemic heart disease. *J Cardiovasc Pharmacol* 17(Suppl 7):470–73, 1991
5. Kurihara H, Yoshizumi M, Sugiyama T, Takaku F, Yanagisawa M, Masaki T, Hamano M, Kato H, Yazaki Y: Transforming growth factor- $\beta$  stimulates the expression of endothelin mRNA by vascular endothelial cells. *Biochem Biophys Res Commun* 159:1435–40, 1989
6. Lerman A, Edwards BS, Hallett JW, Heublein DM, Sandberg SM, Burnett JC Jr: Circulating and tissue endothelin immunoreactivity in advanced atherosclerosis. *N Engl J Med* 325:997–1001, 1991
7. Venecia DG, Davis M, Engerman R: Clinicopathologic correlations in diabetic retinopathy: I. Histology and fluorescein angiography of microaneurysms. *Arch Ophthalmol* 94:1766–73, 1976
